# Supplementary material
Source: MDPI journal article supplement (https://www.mdpi.com/1999-4893/16/9/444)
Supplement: s1 [file s1]

In the paper "Nonsmooth optimization based hyperparameter-free neural networks for large-scale regression", a new nonsmooth optimization-based algorithm for solving large-scale regression problems is introduced. The regression problem is modelled as fully-connected feedforward neural networks with one hidden layer, the piecewise linear activation, and the  $L_1$ -loss functions. A modified version of the limited memory bundle method is applied to minimize this nonsmooth objective. In addition, a novel constructive approach for automated determination of the proper number of hidden nodes is developed. Finally, large real-world data sets are used to evaluate the proposed algorithm and to compare it with some state-of-the-art neural network algorithms for regression. The results demonstrate the superiority of the proposed algorithm as a predictive tool in most data sets used in numerical experiments. Here, we recall the used performance measures and give results with respect to mean absolute error, coefficient of determination, and Pearson's correlation coefficient.

### 1. Performance measures

We now describe the performance measures used in our evaluations and comparisons in the paper "Nonsmooth optimization based hyperparameter-free neural networks for large-scale regression". Let  $e_1, \dots, e_n$  for  $n \geq 1$  be actual observed values for some parameter  $e$  and  $\bar{e}_1, \dots, \bar{e}_n$  be their predicted values. We use the following performance measures:

- *root mean square error:*

$$\text{RMSE} = \left( \frac{1}{n} \sum_{i=1}^n (\bar{e}_i - e_i)^2 \right)^{1/2};$$

- *mean absolute error:*

$$\text{MAE} = \frac{1}{n} \sum_{i=1}^n |\bar{e}_i - e_i|;$$

- *coefficient of determination:*

$$R^2 = 1 - \left( \frac{\sum_{i=1}^n (e_i - \bar{e}_i)^2}{\sum_{i=1}^n (e_i - e_0)^2} \right);$$

- *Pearson's correlation coefficient:*

$$r = \frac{\sum_{i=1}^n (e_i - e_0)(\bar{e}_i - \bar{e}_0)}{\left( \sum_{i=1}^n (e_i - e_0)^2 \sum_{i=1}^n (\bar{e}_i - \bar{e}_0)^2 \right)^{1/2}}.$$

In the  $R^2$  and  $r$  measures,  $e_0$  is the mean of observed values while  $\bar{e}_0$  is the mean of predicted values. The small values of RMSE and MAE measures indicate small deviations of the predictions from actual observations. The  $R^2$  measure ranges from  $-\infty$  to 1:  $R^2 = 1$  means a perfect prediction,  $R^2 = 0$  indicates that the model predictions are as accurate as the mean of the observed data and an efficiency  $-\infty < R^2 < 0$  occurs when the observed mean is a better predictor than the model. The range of  $r$  is from  $-1$  to 1:  $r = 1$  implies that a

linear equation describes the relationship between observed and predicted values perfectly,  $r = -1$  means that all the samples lie on a line for which a predicted value decreases as an observed value increases and  $r = 0$  happens when there is no linear correlation between these values.

## 2. Results

The results with respect to the RMSE values of the test set and the elapsed CPU times are given in the paper "Nonsmooth optimization based hyperparameter-free neural networks for large-scale regression". Here we give results with respect to MAE,  $R^2$ , and  $r$ . Note that in the following tables "Best" corresponds to the best solution obtained with LMBNNR with respect to RMSE.

**Table S1.** MAE,  $R^2$  and  $r$  for test set in Combined cycle power plant data.

| MAE   |        |       |        |       |        |         |
|-------|--------|-------|--------|-------|--------|---------|
| H     | LMBNNR | MBGD  | BGD    | SGD   | ELM    | MONMLP  |
| 2     | 3.487  | 6.703 | 15.910 | 3.634 | 16.660 | 5.276   |
| 5     | 3.342  | 4.807 | 16.650 | 3.470 | 4.125  | 5.172   |
| 10    | 3.176  | 4.563 | 14.706 | 3.332 | 4.125  | 5.140   |
| 50    | 3.079  | 3.727 | 16.093 | 3.226 | 4.125  | 7.614   |
| 100   | 3.079  | 3.638 | 14.870 | 3.182 | 4.125  | 14.777  |
| 200   | 3.079  | 3.605 | 15.118 | 3.221 | 4.125  | t-limit |
| 500   |        | 3.582 | 14.315 | 3.198 | 4.125  | t-limit |
| 5000  |        | 3.571 | 14.529 | 3.249 | 4.125  | t-limit |
| Best: | 3.087  | H=29  |        |       |        |         |
| ASP:  | 3.079  | H=61  |        |       |        |         |
| $R^2$ |        |       |        |       |        |         |
| H     | LMBNNR | MBGD  | BGD    | SGD   | ELM    | MONMLP  |
| 2     | 0.934  | 0.750 | -0.256 | 0.930 | -0.246 | 0.840   |
| 5     | 0.939  | 0.874 | -0.618 | 0.935 | 0.907  | 0.845   |
| 10    | 0.941  | 0.887 | -0.094 | 0.939 | 0.907  | 0.846   |
| 50    | 0.943  | 0.926 | -0.213 | 0.941 | 0.907  | 0.693   |
| 100   | 0.943  | 0.929 | 0.004  | 0.942 | 0.907  | 0.000   |
| 200   | 0.943  | 0.930 | -0.046 | 0.941 | 0.907  | t-limit |
| 500   |        | 0.931 | 0.085  | 0.942 | 0.907  | t-limit |
| 5000  |        | 0.931 | 0.066  | 0.941 | 0.907  | t-limit |
| Best: | 0.944  | H=29  |        |       |        |         |
| ASP:  | 0.943  | H=61  |        |       |        |         |
| $r$   |        |       |        |       |        |         |
| H     | LMBNNR | MBGD  | BGD    | SGD   | ELM    | MONMLP  |
| 2     | 0.967  | 0.867 | 0.108  | 0.967 | -0.288 | 0.916   |
| 5     | 0.969  | 0.935 | 0.169  | 0.969 | 0.953  | 0.919   |
| 10    | 0.970  | 0.942 | 0.087  | 0.970 | 0.953  | 0.920   |
| 50    | 0.971  | 0.962 | -0.204 | 0.972 | 0.953  | 0.910   |
| 100   | 0.971  | 0.964 | 0.110  | 0.972 | 0.953  | 0.787   |
| 200   | 0.971  | 0.965 | -0.042 | 0.972 | 0.953  | t-limit |
| 500   |        | 0.965 | 0.491  | 0.972 | 0.953  | t-limit |
| 5000  |        | 0.965 | 0.738  | 0.972 | 0.953  | t-limit |
| Best: | 0.971  | H=29  |        |       |        |         |
| ASP:  | 0.971  | H=61  |        |       |        |         |

**Table S2.** MAE,  $R^2$  and  $r$  for test set in Airfoil self-noise data.

| MAE   |        |        |        |       |          |         |
|-------|--------|--------|--------|-------|----------|---------|
| H     | LMBNNR | MBGD   | BGD    | SGD   | ELM      | MONMLP  |
| 2     | 3.519  | 5.469  | 7.868  | 3.308 | 77.016   | 4.535   |
| 5     | 3.010  | 5.317  | 7.552  | 2.819 | 25.095   | 4.503   |
| 10    | 3.011  | 4.755  | 7.082  | 2.187 | 25.095   | 4.499   |
| 50    | 2.921  | 4.490  | 5.712  | 1.833 | 25.095   | 5.179   |
| 100   | 1.364  | 4.440  | 5.567  | 1.549 | 25.095   | 5.522   |
| 200   | 1.364  | 4.318  | 5.630  | 1.580 | 25.095   | 5.513   |
| 500   |        | 4.297  | 5.454  | 1.683 | 25.095   | t-limit |
| 5000  |        | 4.294  | 5.417  | 1.532 | 25.095   | t-limit |
| Best: | 1.364  | H=83   |        |       |          |         |
| ASP:  | 1.364  | H=105  |        |       |          |         |
| $R^2$ |        |        |        |       |          |         |
| H     | LMBNNR | MBGD   | BGD    | SGD   | ELM      | MONMLP  |
| 2     | 0.467  | -0.013 | -1.414 | 0.570 | -169.584 | 0.276   |
| 5     | 0.570  | 0.034  | -1.026 | 0.696 | -19.363  | 0.295   |
| 10    | 0.569  | 0.228  | -0.851 | 0.822 | -19.363  | 0.291   |
| 50    | 0.582  | 0.303  | -0.125 | 0.871 | -19.363  | 0.116   |
| 100   | 0.920  | 0.325  | -0.040 | 0.909 | -19.363  | -0.005  |
| 200   | 0.920  | 0.366  | -0.080 | 0.907 | -19.363  | -0.004  |
| 500   |        | 0.373  | -0.008 | 0.890 | -19.363  | t-limit |
| 5000  |        | 0.378  | 0.009  | 0.908 | -19.363  | t-limit |
| Best: | 0.920  | H=83   |        |       |          |         |
| ASP:  | 0.920  | H=105  |        |       |          |         |
| $r$   |        |        |        |       |          |         |
| H     | LMBNNR | MBGD   | BGD    | SGD   | ELM      | MONMLP  |
| 2     | 0.699  | 0.033  | 0.063  | 0.769 | -0.221   | 0.528   |
| 5     | 0.768  | 0.245  | 0.041  | 0.849 | -0.155   | 0.544   |
| 10    | 0.768  | 0.478  | -0.035 | 0.911 | -0.155   | 0.541   |
| 50    | 0.784  | 0.593  | 0.096  | 0.940 | -0.155   | 0.537   |
| 100   | 0.960  | 0.663  | 0.108  | 0.956 | -0.155   | -0.080  |
| 200   | 0.960  | 0.711  | -0.012 | 0.957 | -0.155   | -0.042  |
| 500   |        | 0.723  | 0.054  | 0.949 | -0.155   | t-limit |
| 5000  |        | 0.726  | 0.164  | 0.956 | -0.155   | t-limit |
| Best: | 0.960  | H=83   |        |       |          |         |
| ASP:  | 0.960  | H=105  |        |       |          |         |

**Table S3.** MAE,  $R^2$  and  $r$  for test set in Concrete compressive strength data.

| MAE   |        |        |        |       |        |         |
|-------|--------|--------|--------|-------|--------|---------|
| H     | LMBNNR | MBGD   | BGD    | SGD   | ELM    | MONMLP  |
| 2     | 8.761  | 14.271 | 22.520 | 6.099 | 12.873 | 4.619   |
| 5     | 4.951  | 12.909 | 18.357 | 4.991 | 11.255 | 3.713   |
| 10    | 4.482  | 12.493 | 18.999 | 4.286 | 7.819  | 3.238   |
| 50    | 3.795  | 11.401 | 14.427 | 3.811 | 7.819  | 11.810  |
| 100   | 3.780  | 11.090 | 14.663 | 3.866 | 7.819  | 12.464  |
| 200   | 3.780  | 10.364 | 14.168 | 3.680 | 7.819  | 12.465  |
| 500   |        | 10.315 | 13.593 | 3.622 | 7.819  | t-limit |
| 5000  |        | 10.332 | 13.536 | 3.425 | 7.819  | t-limit |
| Best: | 3.780  | H=96   |        |       |        |         |
| ASP:  | 3.781  | H=74   |        |       |        |         |
| $R^2$ |        |        |        |       |        |         |
| H     | LMBNNR | MBGD   | BGD    | SGD   | ELM    | MONMLP  |
| 2     | 0.521  | -0.118 | -2.544 | 0.787 | -0.079 | 0.841   |
| 5     | 0.836  | 0.102  | -1.011 | 0.854 | 0.205  | 0.900   |
| 10    | 0.869  | 0.170  | -1.101 | 0.888 | 0.615  | 0.926   |
| 50    | 0.903  | 0.323  | -0.153 | 0.912 | 0.615  | 0.104   |
| 100   | 0.904  | 0.367  | -0.181 | 0.908 | 0.615  | -0.001  |
| 200   | 0.904  | 0.442  | -0.089 | 0.915 | 0.615  | 0.000   |
| 500   |        | 0.451  | 0.021  | 0.918 | 0.615  | t-limit |
| 5000  |        | 0.452  | 0.025  | 0.928 | 0.615  | t-limit |
| Best: | 0.904  | H=96   |        |       |        |         |
| ASP:  | 0.904  | H=74   |        |       |        |         |
| $r$   |        |        |        |       |        |         |
| H     | LMBNNR | MBGD   | BGD    | SGD   | ELM    | MONMLP  |
| 2     | 0.762  | 0.116  | -0.017 | 0.889 | 0.082  | 0.917   |
| 5     | 0.917  | 0.351  | -0.048 | 0.930 | 0.465  | 0.949   |
| 10    | 0.933  | 0.441  | 0.021  | 0.946 | 0.785  | 0.962   |
| 50    | 0.952  | 0.594  | 0.141  | 0.959 | 0.785  | 0.886   |
| 100   | 0.952  | 0.655  | -0.008 | 0.959 | 0.785  | -0.252  |
| 200   | 0.952  | 0.722  | 0.012  | 0.962 | 0.785  | -0.241  |
| 500   |        | 0.743  | 0.181  | 0.963 | 0.785  | t-limit |
| 5000  |        | 0.751  | 0.237  | 0.967 | 0.785  | t-limit |
| Best: | 0.952  | H=96   |        |       |        |         |
| ASP:  | 0.952  | H=74   |        |       |        |         |

**Table S4.** MAE,  $R^2$  and  $r$  for test set in Physicochemical properties of protein data.

| MAE   |        |       |        |                      |        |         |
|-------|--------|-------|--------|----------------------|--------|---------|
| H     | LMBNNR | MBGD  | BGD    | SGD                  | ELM    | MONMLP  |
| 2     | 3.941  | 4.399 | 6.651  | 4.265 <sup>(1)</sup> | 5.665  | 3.998   |
| 5     | 3.756  | 4.263 | 6.723  | NaN                  | 5.295  | 3.849   |
| 10    | 3.743  | 4.233 | 6.587  | 3.800 <sup>(2)</sup> | 4.347  | 3.994   |
| 50    | 3.521  | 4.118 | 5.732  | NaN                  | 4.347  | t-limit |
| 100   | 3.520  | 4.073 | 5.710  | NaN                  | 4.347  | t-limit |
| 200   | 3.520  | 4.084 | 5.424  | NaN                  | 4.347  | t-limit |
| 500   |        | 4.122 | 5.471  | NaN                  | 4.347  | t-limit |
| 5000  |        | 4.092 | 5.423  | NaN                  | 4.347  | t-limit |
| Best: | 3.520  | H=56  |        |                      |        |         |
| ASP:  | 3.520  | H=74  |        |                      |        |         |
| $R^2$ |        |       |        |                      |        |         |
| H     | LMBNNR | MBGD  | BGD    | SGD                  | ELM    | MONMLP  |
| 2     | 0.238  | 0.260 | -0.777 | 0.287 <sup>(1)</sup> | -0.192 | 0.347   |
| 5     | 0.297  | 0.289 | -0.979 | NaN                  | -0.106 | 0.389   |
| 10    | 0.305  | 0.300 | -0.844 | 0.361 <sup>(2)</sup> | 0.278  | 0.351   |
| 50    | 0.377  | 0.329 | -0.263 | NaN                  | 0.278  | t-limit |
| 100   | 0.377  | 0.335 | -0.137 | NaN                  | 0.278  | t-limit |
| 200   | 0.377  | 0.338 | -0.027 | NaN                  | 0.278  | t-limit |
| 500   |        | 0.330 | -0.019 | NaN                  | 0.278  | t-limit |
| 5000  |        | 0.338 | 0.010  | NaN                  | 0.278  | t-limit |
| Best: | 0.377  | H=56  |        |                      |        |         |
| ASP:  | 0.377  | H=74  |        |                      |        |         |
| $r$   |        |       |        |                      |        |         |
| H     | LMBNNR | MBGD  | BGD    | SGD                  | ELM    | MONMLP  |
| 2     | 0.539  | 0.511 | -0.045 | 0.551 <sup>(1)</sup> | 0.068  | 0.589   |
| 5     | 0.583  | 0.539 | -0.008 | NaN                  | 0.245  | 0.625   |
| 10    | 0.587  | 0.550 | -0.001 | 0.611 <sup>(2)</sup> | 0.528  | 0.593   |
| 50    | 0.632  | 0.577 | -0.027 | NaN                  | 0.528  | t-limit |
| 100   | 0.632  | 0.581 | -0.010 | NaN                  | 0.528  | t-limit |
| 200   | 0.632  | 0.583 | 0.055  | NaN                  | 0.528  | t-limit |
| 500   |        | 0.579 | 0.031  | NaN                  | 0.528  | t-limit |
| 5000  |        | 0.585 | 0.168  | NaN                  | 0.528  | t-limit |
| Best: | 0.632  | H=56  |        |                      |        |         |
| ASP:  | 0.632  | H=74  |        |                      |        |         |

(1) 2/10 runs led to NaN loss function value.

(2) 8/10 runs led to NaN loss function value.

**Table S5.** MAE,  $R^2$  and  $r$  for test set in Boston housing data.

| MAE   |        |        |        |       |        |         |
|-------|--------|--------|--------|-------|--------|---------|
| H     | LMBNNR | MBGD   | BGD    | SGD   | ELM    | MONMLP  |
| 2     | 3.298  | 7.388  | 9.626  | 3.265 | 7.480  | 2.099   |
| 5     | 3.296  | 6.662  | 9.265  | 2.750 | 6.255  | 1.731   |
| 10    | 2.650  | 6.229  | 9.371  | 2.693 | 4.560  | 1.821   |
| 50    | 2.594  | 5.519  | 7.685  | 2.622 | 3.332  | 2.880   |
| 100   | 2.594  | 5.163  | 7.412  | 2.619 | 3.332  | 4.183   |
| 200   | 2.594  | 4.904  | 6.955  | 2.528 | 3.332  | 5.423   |
| 500   |        | 4.966  | 7.086  | 2.532 | 3.332  | t-limit |
| 5000  |        | 4.917  | 6.681  | 2.494 | 3.332  | t-limit |
| Best: | 2.594  | H=30   |        |       |        |         |
| ASP:  | 2.594  | H=39   |        |       |        |         |
| $R^2$ |        |        |        |       |        |         |
| H     | LMBNNR | MBGD   | BGD    | SGD   | ELM    | MONMLP  |
| 2     | 0.703  | -0.195 | -0.783 | 0.785 | -0.113 | 0.912   |
| 5     | 0.704  | 0.141  | -0.513 | 0.841 | 0.093  | 0.933   |
| 10    | 0.800  | 0.239  | -0.608 | 0.849 | 0.529  | 0.924   |
| 50    | 0.827  | 0.366  | -0.145 | 0.861 | 0.738  | 0.821   |
| 100   | 0.827  | 0.425  | -0.120 | 0.861 | 0.738  | 0.611   |
| 200   | 0.827  | 0.455  | -0.085 | 0.874 | 0.738  | 0.344   |
| 500   |        | 0.425  | -0.051 | 0.870 | 0.738  | t-limit |
| 5000  |        | 0.437  | 0.040  | 0.869 | 0.738  | t-limit |
| Best: | 0.827  | H=30   |        |       |        |         |
| ASP:  | 0.827  | H=39   |        |       |        |         |
| $r$   |        |        |        |       |        |         |
| H     | LMBNNR | MBGD   | BGD    | SGD   | ELM    | MONMLP  |
| 2     | 0.853  | 0.127  | 0.067  | 0.901 | 0.533  | 0.955   |
| 5     | 0.853  | 0.470  | 0.298  | 0.922 | 0.414  | 0.966   |
| 10    | 0.895  | 0.477  | 0.042  | 0.923 | 0.733  | 0.961   |
| 50    | 0.910  | 0.640  | 0.099  | 0.931 | 0.862  | 0.909   |
| 100   | 0.910  | 0.685  | 0.169  | 0.931 | 0.862  | 0.815   |
| 200   | 0.910  | 0.720  | 0.138  | 0.937 | 0.862  | 0.687   |
| 500   |        | 0.698  | 0.132  | 0.936 | 0.862  | t-limit |
| 5000  |        | 0.712  | 0.542  | 0.934 | 0.862  | t-limit |
| Best: | 0.910  | H=30   |        |       |        |         |
| ASP:  | 0.910  | H=39   |        |       |        |         |

**Table S6.** MAE,  $R^2$  and  $r$  for test set in SGEMM GPU kernel performance data.

| MAE   |        |         |         |        |         |         |
|-------|--------|---------|---------|--------|---------|---------|
| H     | LMBNNR | MBGD    | BGD     | SGD    | ELM     | MONMLP  |
| 2     | 84.187 | 106.274 | 332.182 | 97.193 | 196.175 | 57.215  |
| 5     | 56.191 | 75.854  | 403.268 | 63.499 | 181.867 | 41.097  |
| 10    | 47.621 | 63.318  | 360.189 | 45.560 | 176.276 | 48.089  |
| 50    | 47.010 | 61.959  | 286.637 | 28.370 | 176.153 | t-limit |
| 100   | 47.010 | 61.185  | 267.953 | 28.346 | 176.153 | t-limit |
| 200   | 47.010 | 59.193  | 246.155 | 24.309 | 176.153 | t-limit |
| 500   |        | 57.267  | 221.834 | 23.878 | 176.153 | t-limit |
| 5000  |        | 56.482  | 211.507 | 19.731 | t-limit | t-limit |
| Best: | 47.010 | H=19    |         |        |         |         |
| ASP:  | 47.410 | H=18    |         |        |         |         |
| $R^2$ |        |         |         |        |         |         |
| H     | LMBNNR | MBGD    | BGD     | SGD    | ELM     | MONMLP  |
| 2     | 0.634  | 0.768   | -1.038  | 0.838  | 0.223   | 0.940   |
| 5     | 0.897  | 0.878   | -1.273  | 0.916  | 0.303   | 0.966   |
| 10    | 0.934  | 0.900   | -0.892  | 0.954  | 0.395   | 0.952   |
| 50    | 0.936  | 0.913   | -0.366  | 0.986  | 0.407   | t-limit |
| 100   | 0.936  | 0.917   | -0.195  | 0.987  | 0.407   | t-limit |
| 200   | 0.936  | 0.920   | -0.092  | 0.990  | 0.407   | t-limit |
| 500   |        | 0.924   | -0.079  | 0.991  | 0.407   | t-limit |
| 5000  |        | 0.924   | 0.011   | 0.994  | t-limit | t-limit |
| Best: | 0.936  | H=19    |         |        |         |         |
| ASP:  | 0.935  | H=18    |         |        |         |         |
| $r$   |        |         |         |        |         |         |
| H     | LMBNNR | MBGD    | BGD     | SGD    | ELM     | MONMLP  |
| 2     | 0.825  | 0.870   | 0.004   | 0.924  | 0.541   | 0.969   |
| 5     | 0.948  | 0.938   | -0.016  | 0.960  | 0.551   | 0.983   |
| 10    | 0.967  | 0.949   | 0.005   | 0.981  | 0.628   | 0.976   |
| 50    | 0.968  | 0.956   | 0.007   | 0.993  | 0.638   | t-limit |
| 100   | 0.968  | 0.958   | 0.007   | 0.994  | 0.638   | t-limit |
| 200   | 0.968  | 0.960   | 0.093   | 0.996  | 0.638   | t-limit |
| 500   |        | 0.962   | -0.091  | 0.996  | 0.638   | t-limit |
| 5000  |        | 0.962   | 0.125   | 0.997  | t-limit | t-limit |
| Best: | 0.968  | H=19    |         |        |         |         |
| ASP:  | 0.967  | H=18    |         |        |         |         |

**Table S7.** MAE,  $R^2$  and  $r$  for test set in Online news popularity data.

| MAE   |          |          |           |                         |          |          |
|-------|----------|----------|-----------|-------------------------|----------|----------|
| H     | LMBNNR   | MBGD     | BGD       | SGD                     | ELM      | MONMLP   |
| 2     | 2460.334 | 3333.375 | 7630.585  | 3800.756 <sup>(1)</sup> | 3225.340 | 3061.343 |
| 5     | 2450.368 | 3249.126 | 10810.528 | NaN                     | 3205.684 | 3023.191 |
| 10    | 2449.567 | 3464.855 | 10630.898 | NaN                     | 3096.292 | 3000.213 |
| 50    | 2449.517 | 3642.130 | 9047.129  | NaN                     | 3089.455 | t-limit  |
| 100   | 2449.517 | 3632.464 | 7357.324  | NaN                     | 3087.765 | t-limit  |
| 200   | 2449.517 | 4408.260 | 6285.794  | NaN                     | 3087.765 | t-limit  |
| 500   |          | 3609.625 | 4917.437  | NaN                     | 3087.765 | t-limit  |
| 5000  |          | 3484.741 | 3420.317  | NaN                     | t-limit  | t-limit  |
| Best: | 2449.517 | H=19     |           |                         |          |          |
| ASP:  | 2449.517 | H=19     |           |                         |          |          |
| $R^2$ |          |          |           |                         |          |          |
| H     | LMBNNR   | MBGD     | BGD       | SGD                     | ELM      | MONMLP   |
| 2     | -0.016   | -0.002   | -0.690    | -0.031 <sup>(1)</sup>   | -0.009   | 0.097    |
| 5     | -0.014   | -0.002   | -1.331    | NaN                     | -0.002   | 0.278    |
| 10    | -0.012   | -0.010   | -1.209    | NaN                     | 0.014    | 0.271    |
| 50    | -0.012   | -0.065   | -0.806    | NaN                     | 0.024    | t-limit  |
| 100   | -0.012   | -0.073   | -0.440    | NaN                     | 0.024    | t-limit  |
| 200   | -0.012   | -0.112   | -0.298    | NaN                     | 0.024    | t-limit  |
| 500   |          | -0.038   | -0.134    | NaN                     | 0.024    | t-limit  |
| 5000  |          | -0.005   | -0.012    | NaN                     | t-limit  | t-limit  |
| Best: | -0.012   | H=19     |           |                         |          |          |
| ASP:  | -0.012   | H=19     |           |                         |          |          |
| $r$   |          |          |           |                         |          |          |
| H     | LMBNNR   | MBGD     | BGD       | SGD                     | ELM      | MONMLP   |
| 2     | 0.110    | 0.042    | 0.003     | 0.092 <sup>(1)</sup>    | 0.005    | 0.344    |
| 5     | 0.119    | 0.066    | 0.004     | NaN                     | 0.055    | 0.643    |
| 10    | 0.127    | 0.074    | -0.014    | NaN                     | 0.123    | 0.644    |
| 50    | 0.127    | 0.068    | 0.005     | NaN                     | 0.154    | t-limit  |
| 100   | 0.127    | 0.066    | -0.001    | NaN                     | 0.154    | t-limit  |
| 200   | 0.127    | 0.063    | -0.004    | NaN                     | 0.154    | t-limit  |
| 500   |          | 0.081    | -0.006    | NaN                     | 0.154    | t-limit  |
| 5000  |          | 0.114    | 0.011     | NaN                     | t-limit  | t-limit  |
| Best: | 0.127    | H=19     |           |                         |          |          |
| ASP:  | 0.127    | H=19     |           |                         |          |          |

(1) 7/10 runs led to NaN loss function value.



**Table S8.** MAE,  $R^2$  and  $r$  for test set in Residential building data.

| MAE   |         |         |          |                        |          |         |
|-------|---------|---------|----------|------------------------|----------|---------|
| H     | LMBNNR  | MBGD    | BGD      | SGD                    | ELM      | MONMLP  |
| 2     | 119.297 | 787.701 | 1161.594 | 149.070 <sup>(1)</sup> | 1391.853 | 41.736  |
| 5     | 120.137 | 745.838 | 998.809  | 126.355 <sup>(2)</sup> | 1377.299 | 308.112 |
| 10    | 90.924  | 746.882 | 1179.940 | 105.905 <sup>(3)</sup> | 742.278  | 910.196 |
| 50    | 91.620  | 695.736 | 850.053  | 94.044 <sup>(3)</sup>  | 130.341  | 918.273 |
| 100   | 91.620  | 656.278 | 782.288  | NaN                    | 81.144   | t-limit |
| 200   | 91.620  | 627.105 | 708.014  | NaN                    | 81.144   | t-limit |
| 500   |         | 607.388 | 655.423  | NaN                    | 81.144   | t-limit |
| 5000  |         | 492.349 | 568.573  | NaN                    | 81.144   | t-limit |
| Best: | 90.393  | H=11    |          |                        |          |         |
| ASP:  | 91.620  | H=27    |          |                        |          |         |
| $R^2$ |         |         |          |                        |          |         |
| H     | LMBNNR  | MBGD    | BGD      | SGD                    | ELM      | MONMLP  |
| 2     | 0.967   | 0.169   | -0.714   | 0.964 <sup>(1)</sup>   | -1.348   | 0.997   |
| 5     | 0.967   | 0.330   | -0.107   | 0.977 <sup>(2)</sup>   | -1.332   | 0.889   |
| 10    | 0.981   | 0.330   | -0.427   | 0.985 <sup>(3)</sup>   | 0.337    | 0.000   |
| 50    | 0.981   | 0.375   | 0.112    | 0.987 <sup>(3)</sup>   | 0.980    | 0.000   |
| 100   | 0.981   | 0.392   | 0.241    | NaN                    | 0.989    | t-limit |
| 200   | 0.981   | 0.440   | 0.376    | NaN                    | 0.989    | t-limit |
| 500   |         | 0.368   | 0.404    | NaN                    | 0.989    | t-limit |
| 5000  |         | 0.636   | 0.499    | NaN                    | 0.989    | t-limit |
| Best: | 0.981   | H=11    |          |                        |          |         |
| ASP:  | 0.981   | H=27    |          |                        |          |         |
| $r$   |         |         |          |                        |          |         |
| H     | LMBNNR  | MBGD    | BGD      | SGD                    | ELM      | MONMLP  |
| 2     | 0.986   | 0.456   | 0.320    | 0.985 <sup>(1)</sup>   | -0.005   | 0.999   |
| 5     | 0.986   | 0.593   | 0.280    | 0.990 <sup>(2)</sup>   | -0.107   | 1.000   |
| 10    | 0.992   | 0.597   | 0.160    | 0.993 <sup>(3)</sup>   | 0.583    | -0.558  |
| 50    | 0.992   | 0.615   | 0.466    | 0.994 <sup>(3)</sup>   | 0.990    | -0.560  |
| 100   | 0.992   | 0.690   | 0.547    | NaN                    | 0.994    | t-limit |
| 200   | 0.992   | 0.704   | 0.632    | NaN                    | 0.994    | t-limit |
| 500   |         | 0.673   | 0.641    | NaN                    | 0.994    | t-limit |
| 5000  |         | 0.852   | 0.708    | NaN                    | 0.994    | t-limit |
| Best: | 0.992   | H=11    |          |                        |          |         |
| ASP:  | 0.992   | H=27    |          |                        |          |         |

(1) 2/10 runs led to NaN loss function value.

(2) 1/10 runs led to NaN loss function value.

(3) 4/10 runs led to NaN loss function value.

**Table S9.** MAE,  $R^2$  and  $r$  for test set in BlogFeedback data.

| MAE   |        |      |     |     |        |         |
|-------|--------|------|-----|-----|--------|---------|
| H     | LMBNNR | MBGD | BGD | SGD | ELM    | MONMLP  |
| 2     | 6.009  | NaN  | NaN | NaN | 10.379 | 6.454   |
| 5     | 5.770  | NaN  | NaN | NaN | 10.059 | t-limit |
| 10    | 5.574  | NaN  | NaN | NaN | 8.843  | t-limit |
| 50    | 5.574  | NaN  | NaN | NaN | 8.718  | t-limit |
| 100   | 5.574  | NaN  | NaN | NaN | 8.829  | t-limit |
| 200   | 5.574  | NaN  | NaN | NaN | 9.124  | t-limit |
| 500   |        | NaN  | NaN | NaN | 9.123  | t-limit |
| 5000  |        | NaN  | NaN | NaN | 9.123  | t-limit |
| Best: | 5.574  | H=10 |     |     |        |         |
| ASP:  | 5.574  | H=12 |     |     |        |         |
| $R^2$ |        |      |     |     |        |         |
| H     | LMBNNR | MBGD | BGD | SGD | ELM    | MONMLP  |
| 2     | 0.352  | NaN  | NaN | NaN | 0.126  | 0.323   |
| 5     | 0.352  | NaN  | NaN | NaN | 0.152  | t-limit |
| 10    | 0.443  | NaN  | NaN | NaN | 0.340  | t-limit |
| 50    | 0.443  | NaN  | NaN | NaN | 0.374  | t-limit |
| 100   | 0.443  | NaN  | NaN | NaN | 0.375  | t-limit |
| 200   | 0.443  | NaN  | NaN | NaN | 0.380  | t-limit |
| 500   |        | NaN  | NaN | NaN | 0.381  | t-limit |
| 5000  |        | NaN  | NaN | NaN | 0.381  | t-limit |
| Best: | 0.443  | H=10 |     |     |        |         |
| ASP:  | 0.443  | H=12 |     |     |        |         |
| $r$   |        |      |     |     |        |         |
| H     | LMBNNR | MBGD | BGD | SGD | ELM    | MONMLP  |
| 2     | 0.629  | NaN  | NaN | NaN | 0.358  | 0.676   |
| 5     | 0.634  | NaN  | NaN | NaN | 0.394  | t-limit |
| 10    | 0.685  | NaN  | NaN | NaN | 0.585  | t-limit |
| 50    | 0.685  | NaN  | NaN | NaN | 0.613  | t-limit |
| 100   | 0.685  | NaN  | NaN | NaN | 0.614  | t-limit |
| 200   | 0.685  | NaN  | NaN | NaN | 0.618  | t-limit |
| 500   |        | NaN  | NaN | NaN | 0.618  | t-limit |
| 5000  |        | NaN  | NaN | NaN | 0.618  | t-limit |
| Best: | 0.685  | H=10 |     |     |        |         |
| ASP:  | 0.685  | H=12 |     |     |        |         |

**Table S10.** MAE,  $R^2$  and  $r$  for test set in ISOLET data.

| MAE   |        |       |        |     |        |         |
|-------|--------|-------|--------|-----|--------|---------|
| H     | LMBNNR | MBGD  | BGD    | SGD | ELM    | MONMLP  |
| 2     | 3.621  | 4.270 | 7.494  | NaN | 10.648 | 2.102   |
| 5     | 2.954  | 3.831 | 8.759  | NaN | 8.320  | t-limit |
| 10    | 2.749  | 3.665 | 7.982  | NaN | 7.518  | t-limit |
| 50    | 2.748  | 3.642 | 7.888  | NaN | 5.327  | t-limit |
| 100   | 2.748  | 3.607 | 7.815  | NaN | 4.873  | t-limit |
| 200   | 2.748  | 3.605 | 7.301  | NaN | 3.932  | t-limit |
| 500   |        | 3.784 | 7.502  | NaN | 3.414  | t-limit |
| 5000  |        | NaN   | 6.648  | NaN | 3.250  | t-limit |
| Best: | 2.749  | H=10  |        |     |        |         |
| ASP:  | 2.748  | H=14  |        |     |        |         |
| $R^2$ |        |       |        |     |        |         |
| H     | LMBNNR | MBGD  | BGD    | SGD | ELM    | MONMLP  |
| 2     | 0.563  | 0.463 | -0.682 | NaN | -1.972 | 0.859   |
| 5     | 0.669  | 0.547 | -1.444 | NaN | -0.949 | t-limit |
| 10    | 0.717  | 0.574 | -0.850 | NaN | -0.448 | t-limit |
| 50    | 0.716  | 0.587 | -0.791 | NaN | 0.248  | t-limit |
| 100   | 0.716  | 0.591 | -0.754 | NaN | 0.367  | t-limit |
| 200   | 0.716  | 0.592 | -0.539 | NaN | 0.569  | t-limit |
| 500   |        | 0.558 | -0.666 | NaN | 0.669  | t-limit |
| 5000  |        | NaN   | -0.315 | NaN | 0.706  | t-limit |
| Best: | 0.717  | H=10  |        |     |        |         |
| ASP:  | 0.716  | H=14  |        |     |        |         |
| $r$   |        |       |        |     |        |         |
| H     | LMBNNR | MBGD  | BGD    | SGD | ELM    | MONMLP  |
| 2     | 0.761  | 0.676 | 0.050  | NaN | 0.004  | 0.934   |
| 5     | 0.825  | 0.743 | 0.118  | NaN | 0.024  | t-limit |
| 10    | 0.852  | 0.763 | 0.086  | NaN | -0.042 | t-limit |
| 50    | 0.852  | 0.774 | 0.147  | NaN | 0.518  | t-limit |
| 100   | 0.852  | 0.779 | 0.142  | NaN | 0.612  | t-limit |
| 200   | 0.852  | 0.782 | 0.210  | NaN | 0.756  | t-limit |
| 500   |        | 0.800 | 0.242  | NaN | 0.818  | t-limit |
| 5000  |        | NaN   | 0.392  | NaN | 0.840  | t-limit |
| Best: | 0.852  | H=10  |        |     |        |         |
| ASP:  | 0.852  | H=14  |        |     |        |         |

**Table S11.** MAE,  $R^2$  and  $r$  for test set in CIFAR-10 data.

| MAE   |         |      |     |     |         |         |
|-------|---------|------|-----|-----|---------|---------|
| H     | LMBNNR  | MBGD | BGD | SGD | ELM     | MONMLP  |
| 2     | 2.302   | NaN  | NaN | NaN | 4.192   | t-limit |
| 5     | 2.256   | NaN  | NaN | NaN | 2.682   | t-limit |
| 10    | 2.244   | NaN  | NaN | NaN | 2.672   | t-limit |
| 50    | 2.244   | NaN  | NaN | NaN | 2.506   | t-limit |
| 100   | t-limit | NaN  | NaN | NaN | 2.491   | t-limit |
| 200   | t-limit | NaN  | NaN | NaN | 2.464   | t-limit |
| 500   |         | NaN  | NaN | NaN | 2.445   | t-limit |
| 5000  |         | NaN  | NaN | NaN | t-limit | t-limit |
| Best: | 2.244   | H=12 |     |     |         |         |
| ASP:  | 2.244   | H=17 |     |     |         |         |
| $R^2$ |         |      |     |     |         |         |
| H     | LMBNNR  | MBGD | BGD | SGD | ELM     | MONMLP  |
| 2     | 0.029   | NaN  | NaN | NaN | -2.095  | t-limit |
| 5     | 0.054   | NaN  | NaN | NaN | -0.227  | t-limit |
| 10    | 0.067   | NaN  | NaN | NaN | -0.222  | t-limit |
| 50    | 0.067   | NaN  | NaN | NaN | -0.073  | t-limit |
| 100   | t-limit | NaN  | NaN | NaN | -0.058  | t-limit |
| 200   | t-limit | NaN  | NaN | NaN | -0.043  | t-limit |
| 500   |         | NaN  | NaN | NaN | -0.032  | t-limit |
| 5000  |         | NaN  | NaN | NaN | t-limit | t-limit |
| Best: | 0.067   | H=12 |     |     |         |         |
| ASP:  | 0.067   | H=17 |     |     |         |         |
| $r$   |         |      |     |     |         |         |
| H     | LMBNNR  | MBGD | BGD | SGD | ELM     | MONMLP  |
| 2     | 0.278   | NaN  | NaN | NaN | -0.029  | t-limit |
| 5     | 0.321   | NaN  | NaN | NaN | 0.034   | t-limit |
| 10    | 0.331   | NaN  | NaN | NaN | 0.002   | t-limit |
| 50    | 0.331   | NaN  | NaN | NaN | 0.121   | t-limit |
| 100   | t-limit | NaN  | NaN | NaN | 0.142   | t-limit |
| 200   | t-limit | NaN  | NaN | NaN | 0.169   | t-limit |
| 500   |         | NaN  | NaN | NaN | 0.192   | t-limit |
| 5000  |         | NaN  | NaN | NaN | t-limit | t-limit |
| Best: | 0.331   | H=12 |     |     |         |         |
| ASP:  | 0.331   | H=17 |     |     |         |         |

**Table S12.** MAE,  $R^2$  and  $r$  for test set in Greenhouse gas observing network data.

| MAE   |        |                       |          |     |        |         |
|-------|--------|-----------------------|----------|-----|--------|---------|
| H     | LMBNNR | MBGD                  | BGD      | SGD | ELM    | MONMLP  |
| 2     | 18.547 | 32.923 <sup>(1)</sup> | 238.605  | NaN | 54.541 | t-limit |
| 5     | 17.477 | NaN                   | 204.267  | NaN | 32.349 | t-limit |
| 10    | 17.343 | NaN                   | 313.008  | NaN | 32.879 | t-limit |
| 50    | 17.342 | NaN                   | 294.423  | NaN | 20.904 | t-limit |
| 100   | 17.342 | NaN                   | 278.436  | NaN | 18.445 | t-limit |
| 200   | 17.342 | NaN                   | 300.219  | NaN | 16.227 | t-limit |
| 500   |        | NaN                   | 325.884  | NaN | 13.511 | t-limit |
| 5000  | –      | NaN                   | 664.811  | NaN | fail   | t-limit |
| Best: | 17.343 | H=10                  |          |     |        |         |
| ASP:  | 17.343 | H=12                  |          |     |        |         |
| $R^2$ |        |                       |          |     |        |         |
| H     | LMBNNR | MBGD                  | BGD      | SGD | ELM    | MONMLP  |
| 2     | 0.942  | 0.509 <sup>(1)</sup>  | –20.987  | NaN | 0.210  | t-limit |
| 5     | 0.949  | NaN                   | –11.939  | NaN | 0.617  | t-limit |
| 10    | 0.950  | NaN                   | –27.330  | NaN | 0.677  | t-limit |
| 50    | 0.950  | NaN                   | –24.579  | NaN | 0.891  | t-limit |
| 100   | 0.950  | NaN                   | –19.414  | NaN | 0.920  | t-limit |
| 200   | 0.950  | NaN                   | –25.177  | NaN | 0.940  | t-limit |
| 500   |        | NaN                   | –33.636  | NaN | 0.958  | t-limit |
| 5000  |        | NaN                   | –147.049 | NaN | fail   | t-limit |
| Best: | 0.950  | H=10                  |          |     |        |         |
| ASP:  | 0.950  | H=12                  |          |     |        |         |
| $r$   |        |                       |          |     |        |         |
| H     | LMBNNR | MBGD                  | BGD      | SGD | ELM    | MONMLP  |
| 2     | 0.971  | 0.700 <sup>(1)</sup>  | 0.557    | NaN | 0.693  | t-limit |
| 5     | 0.974  | NaN                   | 0.667    | NaN | 0.806  | t-limit |
| 10    | 0.975  | NaN                   | 0.740    | NaN | 0.844  | t-limit |
| 50    | 0.975  | NaN                   | 0.832    | NaN | 0.933  | t-limit |
| 100   | 0.975  | NaN                   | 0.832    | NaN | 0.959  | t-limit |
| 200   | 0.975  | NaN                   | 0.753    | NaN | 0.970  | t-limit |
| 500   |        | NaN                   | 0.795    | NaN | 0.979  | t-limit |
| 5000  |        | NaN                   | 0.838    | NaN | fail   | t-limit |
| Best: | 0.975  | H=10                  |          |     |        |         |
| ASP:  | 0.975  | H=12                  |          |     |        |         |

(1) 4/10 runs led to NaN loss function value.
